# Supplementary material
Source: publisher figshare collection journal article supplement (https://adisjournals.figshare.com/articles/dataset/_/16823503)
Supplement: Supplementary file 1 [file 1]

# Treatment Options and Goals for Patients With Generalized Pustular Psoriasis

James Krueger, Lluís Puig, Diamant Thaçi

American Journal of Clinical Dermatology, 2022. DOI: 10.1007/s40257-021-00658-9

Improvements in our understanding of generalized pustular psoriasis (GPP) and its pathophysiology are leading to the development of new targeted treatments

There are a number of treatment goals for GPP:

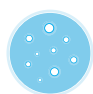

**Rapid control of pustules and prevention of new eruptions**

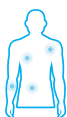

**Control of itch, redness, and edema**

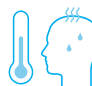

**Fever control**

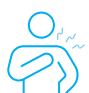

**Control of pain**

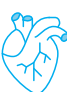

**Prevention of cardiac complications**

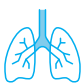

**Prevention of acute respiratory distress syndrome**

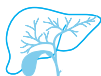

**Control of comorbid cholangitis**

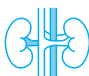

**Prevention of renal failure**

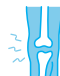

**Control of long-term comorbid psoriatic arthritis**

Globally, a number of therapies are commonly used to treat GPP...

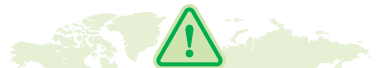

Currently, there are no GPP-specific therapies approved in the USA or Europe for the treatment of GPP and management of GPP flares

**Topical treatments**

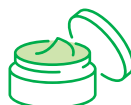

e.g. vitamin D analogues and calcineurin inhibitors

**Systemic treatments**

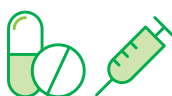

e.g. acitretin, methotrexate, and cyclosporine

...but supporting evidence for their use is limited

Current and emerging biologics target various aspects of GPP pathophysiology...

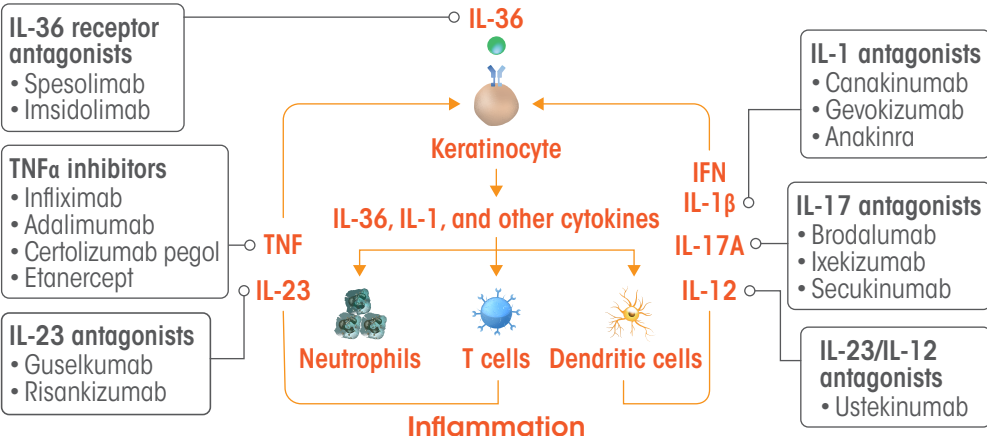

...including the IL-36 pathway, inhibitors of which have shown promising clinical data

The infographic represents the opinion of the authors. For a full list of declarations, including funding and author disclosure statements, please see the full text online.

© The authors, CC-BY-NC 2022
