# Supplementary material
Source: publisher figshare collection journal article supplement (https://adisjournals.figshare.com/articles/dataset/_/16823503)
Supplement: Supplementary file 2 [file 1]

# Clinical Disease Measures in Generalized Pustular Psoriasis

A. David Burden, Siew Eng Choon, Alice B. Gottlieb,  
Alexander Navarini, Richard B. Warren

American Journal of Clinical Dermatology, 2021. DOI: 10.1007/s40257-021-00653-0

Accurate assessment of generalized pustular psoriasis (GPP) disease severity and treatment outcomes is essential for providing effective patient care and for the development and evaluation of novel therapies

## A number of disease measures...

### Physician Global Assessment (PGA)

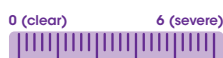

Measures disease severity on a 7-point scale

### Psoriasis Area and Severity Index (PASI)

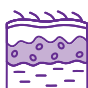

Measures redness, thickness and scaling

### Clinical Global Impression (CGI) scale

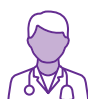

Clinician's view of patient's global function before and after treatment

### Japanese Dermatological Association severity index of GPP (JDA-GPPSI)

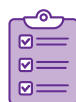

Measures skin symptoms, systemic symptoms, laboratory findings, and disease severity

## ...and patient reported outcomes...

### Psoriasis symptom scale (PSS)

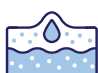

Measures pain, redness, itching, and burning

### Pain visual analog scale (Pain VAS)

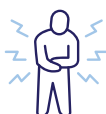

Measures pain severity

### Functional Assessment of Chronic Illness Therapy (FACIT)-Fatigue

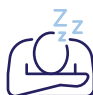

Assesses self-reported fatigue and impact on daily living

### Dermatology Quality of Life Index (DLQI)

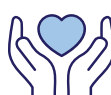

Measures health-related quality of life

...are used in the assessment of GPP, but most have been adopted from other diseases. New GPP-specific clinical disease measures are emerging...

### Generalized Pustular Psoriasis Physician Global Assessment (GPPGA)

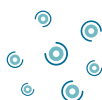

Physician-based assessment of severity of pustules, erythema, and scaling of GPP lesions

### Generalized Pustular Psoriasis Area and Severity Index (GPPASI)

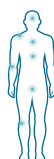

Modification of the PASI score, with the induration component replaced by a pustule component

## ...but these require clinical validation

The infographic represents the opinion of the authors. For a full list of declarations, including funding and author disclosure statements, please see the full text online.

© The authors, CC-BY-NC 2021
