# Supplementary material
Source: publisher figshare collection journal article supplement (https://adisjournals.figshare.com/articles/dataset/_/16823503)
Supplement: Supplementary file 3 [file 1]

# The Prevalence and Disease Characteristics of Generalized Pustular Psoriasis (GPP)

Min Zheng, Denis Jullien, Kilian Eyerich

American Journal of Clinical Dermatology, 2022. DOI 10.1007/s40257-021-00664-x

GPP is a rare and potentially life-threatening disease. While it shares some signs and symptoms with less serious forms of psoriasis, GPP is a separate condition and requires an accurate diagnosis

## What are the characteristics of GPP?

### 1 Recurrent or intermittent disease flares

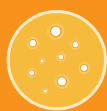

Large areas of painful, non-infectious pustules

#### May co-present with

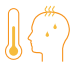

Fever

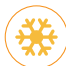

Chills

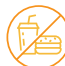

Loss of appetite

### 2 Can require emergency treatment

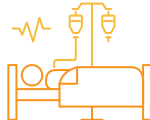

### 3 Can present at any age, including in children

~50 years

Median age at diagnosis

### 4 IL-36 pathway implicated

Some patients have mutations in genes associated with the IL-36 pathway

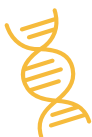

Overexpression of IL-36 cytokines

GPP skin lesions

### 5 Regional differences in frequency of IL-36 receptor antagonist gene (*IL36RN*) variants

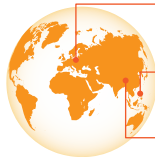

## How common is GPP?

Estimating the number of individuals who are affected by GPP is challenging

- ? Misdiagnosis
- ? Different data sources
- ? Lack of awareness
- ? Non-standardized methodologies
- ? Low patient numbers

Published GPP data are highly variable...

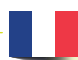

1.76  
France

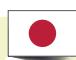

7.46  
Japan

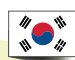

88–124  
Republic of Korea

Cases per million persons

...and may be indicative estimates only

## How to differentiate GPP from plaque psoriasis?

- GPP can manifest with or without concomitant plaque psoriasis
- GPP is a distinct clinical entity from plaque psoriasis with different genetic markers, and a differential diagnosis is critical

Several key factors exist to differentiate GPP from plaque psoriasis

### IL36RN variants and genetic markers

Flare recurrence

Inflammatory cell infiltrate

No transient primary pustule formation at plaque periphery

Edema

Neutrophilic cholangitis

Leukocytosis with neutrophilia and elevated erythrocyte sedimentation rate

Respiratory, cardiac, or renal failure

Increased alkaline phosphatase, transaminase, and bilirubin levels

Fever

The infographic represents the opinion of the authors. For a full list of declarations, including funding and author disclosure statements, please see the full text online.

© The authors, CC-BY-NC 2022
